# Supplementary material
Source: MDPI journal article supplement (https://www.mdpi.com/2076-3263/12/7/272)
Supplement: s1 [file s1]

Archive with 1 entries (1 files):
- geosciences-1701757-supplementary.pdf
